# Supplementary material
Source: PubMed Central journal article supplement (PMC5544591)
Supplement: NIHMS849767-supplement-supplement_1.pdf [file NIHMS849767-supplement-supplement_1.pdf]

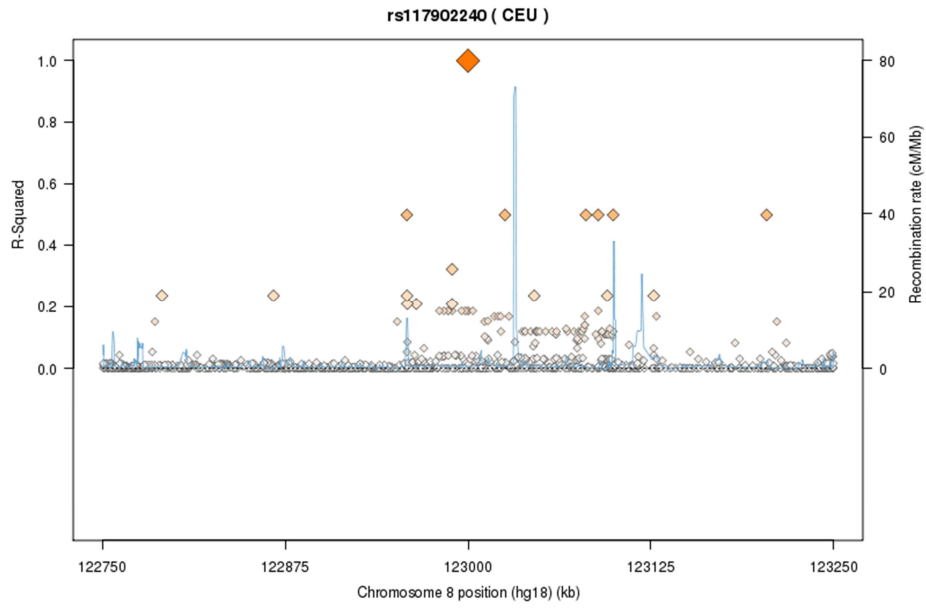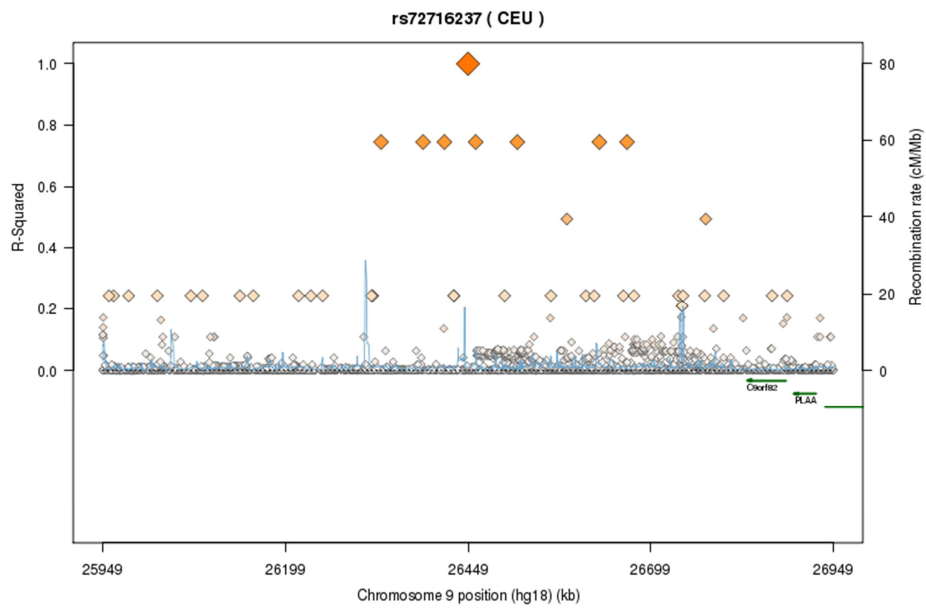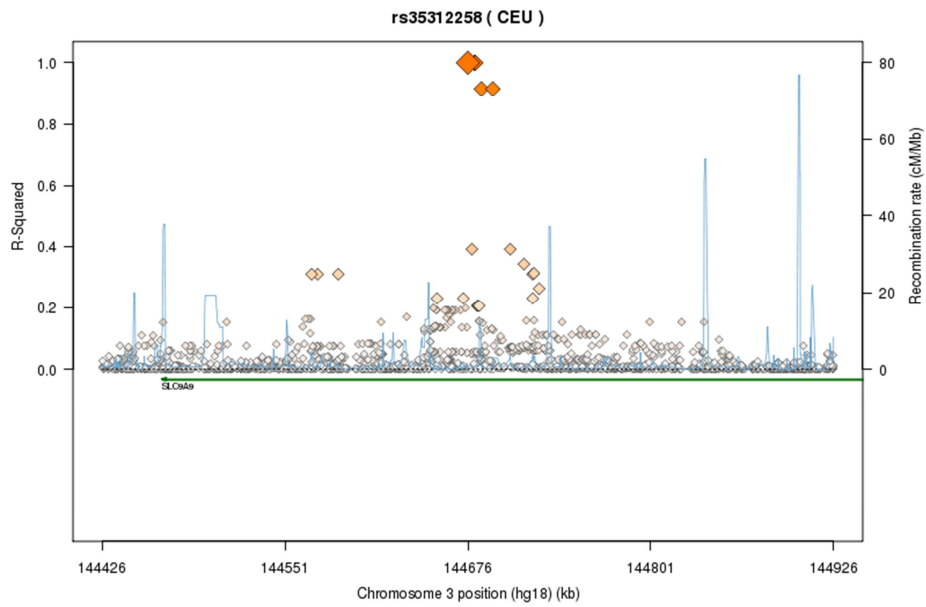

## **Genome-wide interaction study of dust mite allergen on lung function in children with asthma**

### **Online Supplementary Data**

Erick Forno, MD MPH<sup>1,2</sup>, Joanne Sordillo, MD MPH<sup>3</sup>, John Brehm, MD MPH<sup>1,2</sup>, Wei Chen, PhD<sup>1,2</sup>, Takis Benos, PhD<sup>2</sup>, Qi Yan, PhD<sup>1,2</sup>, Lydiana Avila, MD<sup>4</sup>, Manuel Soto-Quirós, MD<sup>4</sup>, Michelle M Cloutier, MD<sup>5</sup>, Angel Colón-Semidey, MD<sup>6</sup>, Maria Alvarez, MD<sup>6</sup>, Edna Acosta-Pérez, PhD<sup>7</sup>, Scott T Weiss, MD MS<sup>3</sup>, Augusto A Litonjua, MD MPH<sup>3</sup>, Glorisa Canino, PhD<sup>7</sup>, Juan C Celedón, MD DrPH<sup>1,2</sup>

*<sup>1</sup>Division of Pediatric Pulmonary Medicine, Allergy, and Immunology, Children's Hospital of Pittsburgh of UPMC, Pittsburgh, PA; <sup>2</sup>University of Pittsburgh School of Medicine, Pittsburgh, PA; <sup>3</sup>Channing Division of Network Medicine, Department of Medicine, Harvard Medical School and Brigham and Women's Hospital, Boston, MA; <sup>4</sup>Department of Pediatric Pulmonology, Hospital Nacional de Niños, San José, Costa Rica; <sup>5</sup>Department of Pediatrics, University of Connecticut Health Center, Farmington, CT; <sup>6</sup>Department of Pediatrics and <sup>7</sup>Behavioral Sciences Research Institute, University of Puerto Rico, San Juan, PR.*

**Corresponding author:** Juan C. Celedón, MD, DrPH, FAAAAI  
Division of Pulmonary Medicine, Allergy and Immunology  
Children's Hospital of Pittsburgh of UPMC  
4401 Penn Avenue, Pittsburgh, PA 15224  
Phone: 412.692.8429; Fax: 412.692.7636  
Email: [juan.celedon@chp.edu](mailto:juan.celedon@chp.edu)

### **FEV<sub>1</sub> – Functional analysis of SNPs rs117902240, rs72716237, and rs35312258**

Using data from ENCODE<sup>1</sup> and is-rSNP<sup>2</sup>, a software designed to predict *in silico* whether a SNP has a regulatory effect on transcription factor binding sites, we found that while SNP rs117902240 in chromosome 8q24.13 is intergenic, it lies within <1 Kbp from a transcription factor binding island identified in ENCODE using ChIP-seq. Transcription factor C/EBP-beta (CEBPB) binds in this region in human lung fibroblasts (ENCODE accession ENCSR000EFM). CEBPB forms part of the signaling pathway of interleukin (IL)-17, nuclear factor Kappa-B (NF-κB), and interferon (IFN-)γ (see **Figure 3** in the main document)<sup>3,4</sup>.

SNP rs72716237, in chromosome 9p21.2, lies right outside (<200bp) a transcription factor binding site for MAFK (ENCODE accession ENCSR000EFH), whose expression can be induced by transcription growth factor (TGF-)β<sup>5</sup>. MAFK regulates expression of NF-κB<sup>6</sup> and NF-E2-related factor 2 (NRF2), implicated in antioxidant pathways<sup>7</sup>. Of note, MAFK and NRF2 may also regulate CFTR gene expression<sup>8</sup>.

SNP rs35312258, in chromosome 3q24, is an intronic SNP in gene *SLC9A9* (solute carrier family 9, subfamily A, member 9), a Na<sup>+</sup>/H<sup>+</sup> transmembrane exchanger that has been linked to autism and ADHD<sup>9</sup>, and more recently to increased arterial stiffness<sup>10</sup>.

## **Supplemental Figures – Titles and Legends**

### **Figure S1** – Regional LD plots of the three top SNPs for FEV<sub>1</sub>

Linkage disequilibrium (LD) plots generated at the SNP Annotation and Proxy Search (SNAP) website (<https://www.broadinstitute.org/mpg/snap/ldplot.php>) using data from the 1,000 Genomes Pilot 1.

**Table S1 – Main effects of the three top SNPs on FEV<sub>1</sub>, in PRGOAL as a whole and stratified by dust mite allergen level.**

|                       | <b>rs117902240</b>                                  | <b>rs72716237</b>                                   | <b>rs35312258</b>                                    |
|-----------------------|-----------------------------------------------------|-----------------------------------------------------|------------------------------------------------------|
| <b>Non-stratified</b> | +0.07 (0.10)<br>p=0.48                              | -0.04 (0.09)<br>p=0.64                              | +0.03 (0.052)<br>p=0.33                              |
| <b>Low dust mite</b>  | <b>+0.84 (0.15)</b><br><b>p=1.2x10<sup>-7</sup></b> | <i>-0.39 (0.11)</i><br><i>p=5.3x10<sup>-4</sup></i> | <i>-0.14 (0.052)</i><br><i>p=0.0061</i>              |
| <b>High dust mite</b> | <i>-0.41 (0.14)</i><br><i>p=0.0032</i>              | <b>+0.49 (0.15)</b><br><b>p=0.0011</b>              | <b>+0.21 (0.051)</b><br><b>p=1.0x10<sup>-4</sup></b> |

Shown are the beta coefficients (standard error) and p-values for the additive, adjusted genotypic models in PRGOAL, for the whole cohort or stratified by low (<2mcg/g, n=227) or high (≥2 mcg/g, n=213) dust mite allergen level. **Positive association in bold**, *negative association in italics*. All models adjusted for age, sex, height, and height<sup>2</sup>.

**Table S2 – SNPs in IL-9, IL-10, TGF- $\beta$ 1, or P2RY2 associated with FEV1**

| <b>GENE</b>  | <b>SNP</b>   | <b>A1</b>  | <b>Covariate<sup>1</sup></b> | <b>BETA</b>          | <b>P-VAL</b> |
|--------------|--------------|------------|------------------------------|----------------------|--------------|
| <b>IL9</b>   | rs2066758    | G          | Genotype main effect         | 0.1604               | 0.046        |
|              | rs4390174    | G          | <b>Genotype*dust mite</b>    | 0.082                | 0.039        |
| <b>IL10</b>  | rs3024498    | G          | Genotype main effect         | 0.076                | 0.042        |
|              | rs6673928    | A          | Genotype main effect         | 0.075                | 0.046        |
|              | rs62285907   | G          | <b>Genotype*dust mite</b>    | 0.16                 | 0.0033       |
|              | rs58448575   | A          | <b>Genotype*dust mite</b>    | -0.22                | 0.0075       |
|              | rs2276763    | A          | <b>Genotype*dust mite</b>    | 0.57                 | 0.0077       |
|              | rs7646193    | C          | <b>Genotype*dust mite</b>    | -0.19                | 0.011        |
|              | <b>P2RY2</b> | rs58448575 | A                            | Genotype main effect | -0.19        |
| rs62285878   |              | A          | <b>Genotype*dust mite</b>    | -0.31                | 0.042        |
| rs116537786  |              | A          | <b>Genotype*dust mite</b>    | 0.21                 | 0.044        |
| rs16863376   |              | G          | <b>Genotype*dust mite</b>    | -0.29                | 0.047        |
| rs765281     |              | G          | <b>Genotype*dust mite</b>    | -0.11                | 0.047        |
| <b>TGFB1</b> | rs79033882   | G          | <b>Genotype*dust mite</b>    | -0.076               | 0.037        |

Models included the main effects of genotype (additive) and dust mite allergen level (dichotomized <2 vs  $\geq$ 2 mcg/g) and the interaction term (*genotype\*dust mite allergen level*), and were additionally adjusted for age, sex, study site (San Juan, PR, or Hartford, CT), height, and height<sup>2</sup>, and principal components. SNP=single nucleotide polymorphism; A1=minor allele; BETA=beta coefficient; P-VAL=one-sided p-value.

**Table S3 – GWIS results for dust mite allergen level and FEV<sub>1</sub>/FVC in PRGOAL**

| <b>SNP</b>  | <b>CHR</b> | <b>BP</b> | <b>A1</b> | <b>A2</b> | <b>BETA</b> | <b>P-VAL</b>    | <b>MAF</b> |
|-------------|------------|-----------|-----------|-----------|-------------|-----------------|------------|
| rs17048089  | 3          | 68923779  | G         | A         | -0.067      | <b>4.01E-07</b> | 0.204      |
| rs115997623 | 4          | 119115917 | A         | G         | 0.37        | <b>3.94E-07</b> | 0.011      |
| rs10021113  | 4          | 159678591 | A         | G         | 0.36        | <b>1.51E-07</b> | 0.013      |
| rs75863350  | 5          | 148423424 | A         | G         | 0.47        | <b>2.79E-07</b> | 0.013      |
| rs78930606  | 6          | 119078652 | C         | A         | -0.32       | <b>1.49E-07</b> | 0.018      |

Models included the main effects of genotype (additive) and dust mite allergen level (dichotomized <2 vs ≥2 mcg/g) and the interaction term (*genotype\*dust mite allergen level*), and were additionally adjusted for age, sex, study site (San Juan, PR, or Hartford, CT), height, and height<sup>2</sup>, and principal components. SNP=single nucleotide polymorphism; CHR=chromosome; BP=base position; A1=minor allele; A2=major allele; BETA=beta coefficient for interaction term; P-VAL=interaction p-value; MAF=minor allele frequency.

**Table S4 – GWIS replication results for FEV<sub>1</sub>/FVC in CAMP and the GACRS**

| FEV <sub>1</sub> /FVC | CAMP Caucasians |       |              | CAMP Hispanics |        |      | GACRS        |        |             | COMBINED P-VAL |             |
|-----------------------|-----------------|-------|--------------|----------------|--------|------|--------------|--------|-------------|----------------|-------------|
|                       | SNP             | A1    | BETA         | <u>P-VAL</u>   | A1     | BETA | <u>P-VAL</u> | A1     | BETA        | <u>P-VAL</u>   | All cohorts |
| rs17048089            | G               | 1.35  | 0.20         | G              | -1.077 | 0.39 | G            | -0.22  | 0.45        | <b>1.6E-05</b> | 0.35        |
| rs115997623           | T               | 0.64  | 0.44         | T              | NA     | NA   | T            | -13.55 | <b>0.04</b> | <b>1.5E-06</b> | 0.10        |
| rs10021113            | T               | NA    | NA           | T              | NA     | NA   | T            | NA     | NA          | NA             | NA          |
| rs75863350            | A               | NA    | NA           | A              | NA     | NA   | A            | NA     | NA          | NA             | NA          |
| rs78930606            | C               | 10.99 | <b>0.037</b> | C              | NA     | NA   | C            | NA     | NA          | <b>9.9E-07</b> | NA          |

Models included the main effects of genotype (additive) and dust mite allergen level (dichotomized <2 vs ≥2 mcg/g) and the interaction term (*genotype\*dust mite allergen level*), and were additionally adjusted for age, sex, study site, and principal components. SNP=single nucleotide polymorphism; A1=minor allele; BETA=beta coefficient for interaction term; P-VAL=interaction p-value; MAF=minor allele frequency; NA=not available (genotyped or imputed). Combined P-values calculated only if at least two cohorts were significant.



**Table S5 – Post hoc power calculations for interaction term based on results from SNP rs117902240**

|                |             |             |              |              |
|----------------|-------------|-------------|--------------|--------------|
| <b>Alpha =</b> | <b>0.05</b> | <b>0.01</b> | <b>0.005</b> | <b>0.001</b> |
| <b>Power =</b> | 0.8975      | 0.7427      | 0.6630       | 0.4749       |

Shown are power calculations using different levels of significance. Calculations were performed using Quanto (<http://biostats.usc.edu/Quanto.html>), given a population mean FEV1 of 1.87 with SD=0.65 (see Table 1, main manuscript), an exposure proportion of 48.4% (Table 1), and risk allele frequency of 0.015 (rs117902240, Table 2), with N=440, and based on the observed main effects of the additive SNP and dust mite level as well as their interaction, using a 2-sided test (null: no significant interaction).

### **Online Supplement References**

1. ENCODE Project Consortium. An integrated encyclopedia of DNA elements in the human genome. *Nature* 2012;**489**(7414):57-74.
2. Macintyre G, Bailey J, Haviv I, et al. is-rSNP: a novel technique for in silico regulatory SNP detection. *Bioinformatics* 2010;**26**(18):i524-30.
3. Ruddy MJ, Wong GC, Liu XK, et al. Functional cooperation between interleukin-17 and tumor necrosis factor-alpha is mediated by CCAAT/enhancer-binding protein family members. *The Journal of biological chemistry* 2004;**279**(4):2559-67.
4. Gaffen SL. Structure and signalling in the IL-17 receptor family. *Nat Rev Immunol* 2009;**9**(8):556-67.
5. Okita Y, Kamoshida A, Suzuki H, et al. Transforming growth factor-beta induces transcription factors MafK and Bach1 to suppress expression of the heme oxygenase-1 gene. *The Journal of biological chemistry* 2013;**288**(28):20658-67.
6. Hwang YJ, Lee EW, Song J, et al. MafK positively regulates NF-kappaB activity by enhancing CBP-mediated p65 acetylation. *Scientific reports* 2013;**3**:3242.
7. Ishikawa T. Genetic polymorphism in the NRF2 gene as a prognosis marker for cancer chemotherapy. *Frontiers in genetics* 2014;**5**:383.
8. Zhang Z, Leir SH, Harris A. Oxidative stress regulates CFTR gene expression in human airway epithelial cells through a distal antioxidant response element. *Am J Respir Cell Mol Biol* 2015;**52**(3):387-96.
9. Zayats T, Athanasiu L, Sonderby I, et al. Genome-wide analysis of attention deficit hyperactivity disorder in Norway. *PLoS One* 2015;**10**(4):e0122501.
10. Levy D, Larson MG, Benjamin EJ, et al. Framingham Heart Study 100K Project: genome-wide associations for blood pressure and arterial stiffness. *BMC Med Genet* 2007;**8 Suppl 1**:S3.
